# Supplementary material for: Factors Affecting Targeted Sequencing of 353 Nuclear Genes From Herbarium Specimens Spanning the Diversity of Angiosperms
Source: Front Plant Sci. 2019 Sep 18;10:1102. doi: 10.3389/fpls.2019.01102 (PMC6759688; doi:10.3389/fpls.2019.01102)
Supplement: Supplementary file 9 [file Table_6.xlsx]

## Sheet: Table S6
Table S6. P-values from Mann-Whitney tests (above diagonal) and Kolmogorov-Smirnov tests (below diagonal) on distribution of mean exon coverage grouped by material source.
	Herbarium (old)	Herbarium (recent)	Silica gel-dried
Herbarium (old)	-	0.002647	0.000478
Herbarium (recent)	0.000609	-	0.301642
Silica gel-dried	4.8e-05	0.242203	-
